# Supplementary material for: Targeted HPTLC Profile, Quantification of Flavonoids and Phenolic Acids, and Antimicrobial Activity of Dodonaea angustifolia (L.f.) Leaves and Flowers
Source: MDPI journal article supplement (doi:10.3390/molecules28062870), 2023-03-22
Supplement: s1 [file s1]

**Table S1.** Phenolic acids peak at 273 nm for Flower and Leave samples.

| Sample | Peak Number | Max Rf   | Height   | Height % | Area     | Area %   | Assigned substance |
|--------|-------------|----------|----------|----------|----------|----------|--------------------|
| DAF    | 1           | 0.017532 | 0.074595 | 7.18096  | 0.001192 | 1.750044 |                    |
| DAF    | 2           | 0.227922 | 0.058172 | 5.599932 | 0.001772 | 2.601398 |                    |
| DAF    | 3           | 0.334416 | 0.078618 | 7.568258 | 0.003303 | 4.84773  | Chlorogenic acid   |
| DAF    | 4           | 0.374675 | 0.090487 | 8.71078  | 0.003507 | 5.14676  |                    |
| DAF    | 5           | 0.470779 | 0.026823 | 2.582139 | 0.001011 | 1.484161 |                    |
| DAF    | 6           | 0.573377 | 0.026614 | 2.562002 | 0.000723 | 1.061726 |                    |
| DAF    | 7           | 0.672078 | 0.05029  | 4.841246 | 0.001057 | 1.55081  | Gallic acid        |
| DAF    | 8           | 0.738312 | 0.135771 | 13.07006 | 0.003544 | 5.201121 | Syringic acid      |
| DAF    | 9           | 0.814935 | 0.497422 | 47.88463 | 0.052026 | 76.35625 |                    |
| DAL    | 1           | 0.134416 | 0.027493 | 2.143005 | 0.000537 | 0.533998 |                    |
| DAL    | 2           | 0.230519 | 0.043594 | 3.397995 | 0.001477 | 1.4686   |                    |
| DAL    | 3           | 0.37987  | 0.12896  | 10.05202 | 0.005599 | 5.567087 | Chlorogenic acid   |
| DAL    | 4           | 0.475974 | 0.067411 | 5.25449  | 0.003222 | 3.20352  |                    |
| DAL    | 5           | 0.577273 | 0.073522 | 5.730762 | 0.003664 | 3.643362 | Gallic acid        |
| DAL    | 6           | 0.674675 | 0.094064 | 7.332004 | 0.002549 | 2.534259 | Syringic acid      |
| DAL    | 7           | 0.821429 | 0.657575 | 51.25578 | 0.07386  | 73.43587 |                    |
| DAL    | 8           | 0.930519 | 0.190309 | 14.83395 | 0.009669 | 9.613304 |                    |

**Table S2.** Flavonoids peak at 366 nm for DAL and DAF samples.

| Sample | Group of std | Peak Number | Max Rf   | Height   | Height % | Area     | Area %   | Assigned substance |
|--------|--------------|-------------|----------|----------|----------|----------|----------|--------------------|
| DAF    | R+Q          | 1           | 0.029221 | 0.072513 | 3.550314 | 0.00104  | 1.463886 |                    |
| DAF    |              | 2           | 0.056494 | 0.140997 | 6.903387 | 0.002376 | 3.343433 |                    |
| DAF    |              | 3           | 0.082468 | 0.165065 | 8.08176  | 0.002313 | 3.255528 | Rutin 3            |
| DAF    |              | 4           | 0.094156 | 0.271733 | 13.30437 | 0.00567  | 7.979827 |                    |
| DAF    |              | 5           | 0.159091 | 0.02071  | 1.013992 | 0.0004   | 0.562942 |                    |
| DAF    |              | 6           | 0.312338 | 0.043578 | 2.133647 | 0.001275 | 1.79383  |                    |
| DAF    |              | 7           | 0.462987 | 0.065191 | 3.191805 | 0.002315 | 3.258083 |                    |
| DAF    |              | 8           | 0.485065 | 0.126123 | 6.175144 | 0.001934 | 2.721258 | Quercetin 3        |
| DAF    |              | 9           | 0.501948 | 0.213575 | 10.45688 | 0.005397 | 7.595727 |                    |
| DAF    |              | 10          | 0.548701 | 0.395632 | 19.37059 | 0.016738 | 23.55496 |                    |
| DAF    |              | 11          | 0.614935 | 0.527319 | 25.81811 | 0.0316   | 44.47053 |                    |
| DAF    | M+K          | 1           | 0.052597 | 0.047943 | 1.541725 | 0.000951 | 0.720274 |                    |
| DAF    |              | 2           | 0.078571 | 0.036902 | 1.186688 | 0.00042  | 0.318369 |                    |
| DAF    |              | 3           | 0.126623 | 0.155506 | 5.000696 | 0.00449  | 3.401952 |                    |
| DAF    |              | 4           | 0.165584 | 0.186874 | 6.009414 | 0.006745 | 5.111274 |                    |

|     |     |    |          |          |          |          |          |             |
|-----|-----|----|----------|----------|----------|----------|----------|-------------|
| DAF |     | 5  | 0.472078 | 0.034674 | 1.115025 | 0.001648 | 1.248498 | Kaempferol  |
| DAF |     | 6  | 0.578571 | 0.067373 | 2.166574 | 0.002073 | 1.570525 |             |
| DAF |     | 7  | 0.625325 | 0.24921  | 8.014023 | 0.006778 | 5.136223 | Myrcetin    |
| DAF |     | 8  | 0.648701 | 0.42339  | 13.61522 | 0.01393  | 10.555   |             |
| DAF |     | 9  | 0.696753 | 0.51126  | 16.44093 | 0.028483 | 21.58292 |             |
| DAL | Q+R | 1  | 0.025325 | 0.024707 | 1.039441 | 0.000236 | 0.268393 |             |
| DAL |     | 2  | 0.069481 | 0.156982 | 6.604309 | 0.003269 | 3.718966 | Rutin 3     |
| DAL |     | 3  | 0.096753 | 0.284615 | 11.97392 | 0.007163 | 8.149491 |             |
| DAL |     | 4  | 0.168182 | 0.035254 | 1.483175 | 0.000838 | 0.953951 |             |
| DAL |     | 5  | 0.188961 | 0.031149 | 1.310454 | 0.000428 | 0.486482 |             |
| DAL |     | 6  | 0.275974 | 0.025409 | 1.068975 | 0.000698 | 0.794222 |             |
| DAL |     | 7  | 0.321429 | 0.051414 | 2.163017 | 0.001583 | 1.801545 |             |
| DAL |     | 8  | 0.352597 | 0.036073 | 1.517616 | 0.000761 | 0.865601 |             |
| DAL |     | 9  | 0.466883 | 0.108408 | 4.560785 | 0.003494 | 3.974727 |             |
| DAL |     | 10 | 0.488961 | 0.176523 | 7.426442 | 0.002646 | 3.010885 | Quercetin 3 |
| DAL |     | 11 | 0.505844 | 0.307415 | 12.93313 | 0.008269 | 9.407533 |             |
| DAL |     | 12 | 0.547403 | 0.338216 | 14.22895 | 0.010977 | 12.4885  |             |
| DAL |     | 13 | 0.617532 | 0.591673 | 24.89202 | 0.036178 | 41.16094 |             |
| DAL |     | 14 | 0.785065 | 0.209119 | 8.797761 | 0.011355 | 12.91877 |             |
| DAL | M+K | 1  | 0.026623 | 0.045109 | 0.933607 | 0.000431 | 0.21226  |             |
| DAL |     | 2  | 0.053896 | 0.020298 | 0.420102 | 0.00036  | 0.17732  |             |
| DAL |     | 3  | 0.082468 | 0.025704 | 0.531995 | 0.000351 | 0.172856 |             |
| DAL |     | 4  | 0.129221 | 0.166439 | 3.444747 | 0.00442  | 2.175436 |             |
| DAL |     | 5  | 0.159091 | 0.268935 | 5.566098 | 0.009171 | 4.513845 |             |
| DAL |     | 6  | 0.265584 | 0.046146 | 0.955079 | 0.002198 | 1.081581 |             |
| DAL |     | 7  | 0.408442 | 0.046574 | 0.963942 | 0.001984 | 0.976351 |             |
| DAL |     | 8  | 0.491558 | 0.086044 | 1.780837 | 0.002453 | 1.207428 |             |
| DAL |     | 9  | 0.555195 | 0.099654 | 2.06252  | 0.002262 | 1.113144 |             |
| DAL |     | 10 | 0.62013  | 0.395708 | 8.189892 | 0.019586 | 9.639872 |             |
| DAL |     | 11 | 0.644805 | 0.438288 | 9.071162 | 0.012453 | 6.129081 | Myrcetin    |
| DAL |     | 12 | 0.695455 | 0.649049 | 13.43325 | 0.038988 | 19.189   |             |
| DAL |     | 13 | 0.855195 | 0.245164 | 5.074119 | 0.013346 | 6.568701 |             |
